# Supplementary material for: Fetal Sex and Maternal Risk of Gestational Diabetes Mellitus: The Impact of Having a Boy
Source: Oxford University Press journal article supplement (doi:10.2337/dc14-2551), 2015-02-18
Supplement: dc142551supplementarydata.xls [file dc142551supplementarydata.xls]

## Sheet: Sheet1
Online Figure 1: Comparison of women carrying a male fetus and those carrying a female fetus, with respect to mean
adjusted insulin levels during the OGTT, adjusted for weeks gestation at OGTT, maternal age, ethnicity, family history
of type 2 diabetes, pre-pregnancy BMI, weight gain in pregnancy up to the OGTT and infant birthweight. Data are
presented as adjusted mean with standard error.
Mean adjusted insulin levels during the OGTT
